# Supplementary material for: Dynamic map of protein interactions in the Escherichia coli chemotaxis pathway
Source: PubMed Central journal article supplement — Mol Syst Biol. 2009 Jan 20;5:238. doi: 10.1038/msb.2008.77 (PMC2644175; doi:10.1038/msb.2008.77), 2009-01-20
Supplement: msb200877-s1.pdf [file msb200877-s1.pdf]

## Supplementary data

### Dynamic map of protein interactions in the *Escherichia coli* chemotaxis pathway

David Kentner, Victor Sourjik

#### Table of content:

**Figure S1** Microscopy setups used to measure FRET.

**Figure S2** Localization of CheZ in *cheA<sup>M98I</sup>* cells.

**Figure S3** Attractant exchange profile during kinetics measurements.

**Table SI** Strains and plasmids used in this study.

*Supplementary references for Table SI.*

**Table SII** FRET mapping of protein interactions by acceptor photobleaching.

**Table SIII** Total and stimulation-dependent FRET values.

**Table SIV** Expression levels of FRET pairs used for attractant stimulation experiments.

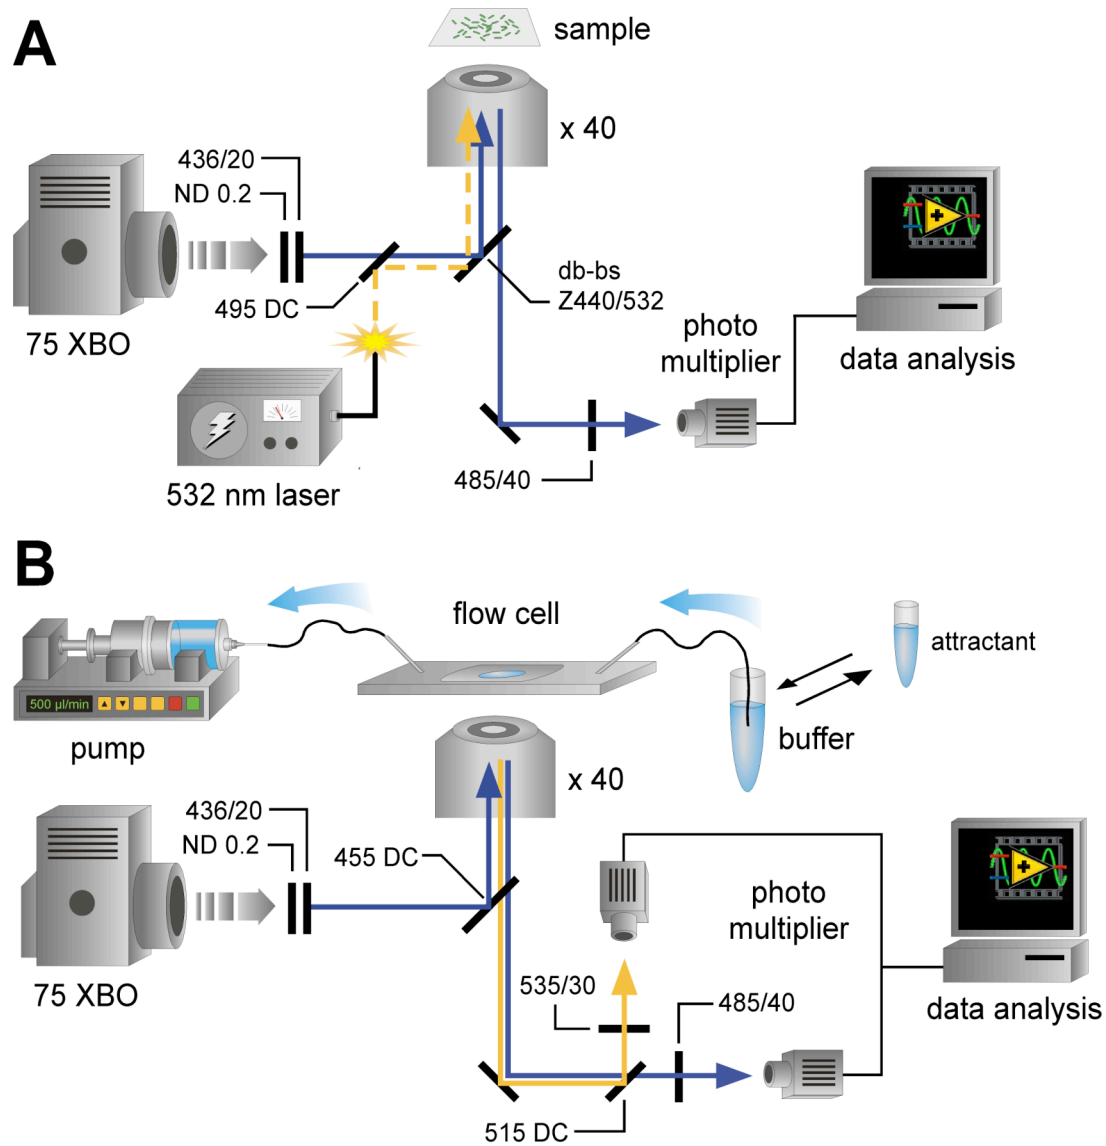

**Figure S1** Microscopy setups used to measure FRET. **(A)** Acceptor photobleaching assay.

**(B)** Flow assay used to test stimulation dependence of protein interactions.

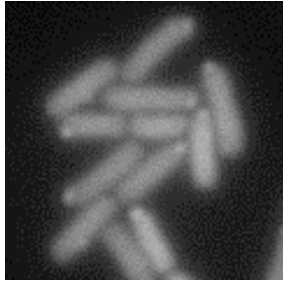

**Figure S2** Localization of CheZ in *cheA<sup>M98I</sup>* cells. CheZ-YFP is expressed at 5  $\mu$ M IPTG induction in strain VS176 ( $\Delta$ *cheY-cheZ cheA<sup>M98I</sup>*), which contains CheA<sub>L</sub>, but not CheA<sub>S</sub>.

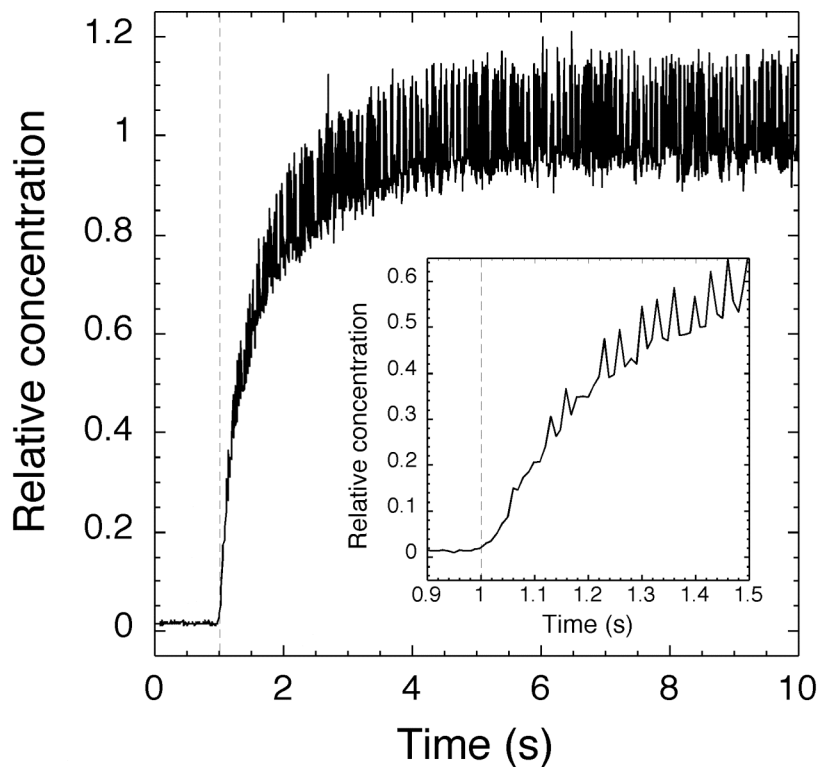

**Figure S3** Attractant exchange profile during kinetics measurements. Exchange profile was measured as fluorescence in yellow channel using 100 nM solution of fluorescein as a tracer, and normalized to the final level of fluorescence. Signal integration time was 0.01 s. *Inset* shows profile during first 0.5 s of the exchange. Dashed line marks beginning of the exchange at 1 s. With the final concentration of aspartate used in these experiments being 10 mM, the saturating stimulation was reached in < 0.1 s. Signal fluctuations are due to the shot noise of the measurement.

**Table S1** Strains and plasmids used in this study.

| Strain or plasmid  | Relevant genotype                                                                             | Reference                                                                                  |
|--------------------|-----------------------------------------------------------------------------------------------|--------------------------------------------------------------------------------------------|
| <b>Strains</b>     |                                                                                               |                                                                                            |
| RP437              | wild type                                                                                     | Parkinson and Houts, 1982                                                                  |
| RP1076             | $\Delta(\text{cheW tar tap cheR cheB cheY})$                                                  | Sandy Parkinson, personal gift; Sourjik and Berg, 2004                                     |
| RP2893             | $\Delta(\text{tap cheR cheB cheY cheZ})$                                                      | Sandy Parkinson, personal gift; Sourjik and Berg, 2002                                     |
| RP4972             | $\Delta\text{cheB}$                                                                           | Sandy Parkinson, personal gift; Lovdok <i>et al</i> , 2007                                 |
| RBB1041            | $\Delta(\text{cheA cheW tar tap cheR cheB cheY cheZ})::\text{Zeo}^R$                          | Robert B. Bourret, personal gift; Kentner <i>et al</i> , 2006; Sourjik <i>et al</i> , 2004 |
| UU1250             | <i>tsr tar tap trg aer</i>                                                                    | Ames <i>et al</i> , 2002                                                                   |
| VS100              | $\Delta\text{cheY}$                                                                           | Sourjik and Berg, 2000                                                                     |
| VS116              | $\Delta\text{flhC}$                                                                           | Kentner <i>et al</i> , 2006                                                                |
| VS124              | $\Delta(\text{cheB cheY cheZ})$                                                               | Sourjik and Berg, 2002                                                                     |
| VS126              | $\Delta\text{cheR}$                                                                           | Lovdok <i>et al</i> , 2007                                                                 |
| VS149              | $\Delta(\text{cheR cheB cheY cheZ})$                                                          | Sourjik and Berg, 2004                                                                     |
| VS153              | $\Delta(\text{cheR cheB cheY cheZ}) \Delta\text{tsr}$                                         | Sourjik and Berg, 2004                                                                     |
| VS161              | $\Delta\text{cheZ}$                                                                           | Lovdok <i>et al</i> , 2007; Vaknin and Berg, 2004                                          |
| VS166              | $\Delta\text{cheA}$                                                                           | this study                                                                                 |
| VS167              | $\Delta\text{cheA } \Delta(\text{tap cheR cheB cheY cheZ})$                                   | this study                                                                                 |
| VS176              | $\Delta(\text{cheY cheZ}) \text{cheA}^{\text{M981}}$                                          | Ady Vaknin, personal gift                                                                  |
| VS177              | $\Delta(\text{cheY cheZ}) \text{cheA}\Delta\text{P2}$                                         | Ady Vaknin, personal gift                                                                  |
| DK1                | $\Delta(\text{cheR cheB cheY cheZ}) \Delta\text{tsr tar}\Delta\text{pp}$                      | this study                                                                                 |
| <b>Plasmids</b>    |                                                                                               |                                                                                            |
| pTrc99a            | Expression vector. pBR ori, pTrc promoter, Amp <sup>R</sup> .                                 | Amann <i>et al</i> , 1988                                                                  |
| pBAD33             | Expression vector. pACYC ori, pBAD promoter; Cm <sup>R</sup> .                                | Guzman <i>et al</i> , 1995                                                                 |
| pDK2 <sup>a</sup>  | Expression vector for cloning of N-terminal CFP <sup>A206K</sup> fusions; pTrc99a derivative. | Kentner <i>et al</i> , 2006                                                                |
| pDK4 <sup>a</sup>  | Expression vector for cloning of N-terminal YFP <sup>A206K</sup> fusions; pTrc99a derivative. | Kentner <i>et al</i> , 2006                                                                |
| pDK66 <sup>a</sup> | Expression vector for cloning of C-terminal YFP <sup>A206K</sup> fusions; pTrc99a derivative. | Kentner <i>et al</i> , 2006                                                                |
| pDK85 <sup>a</sup> | Expression vector for cloning of C-terminal CFP <sup>A206K</sup> fusions; pTrc99a derivative. | Kentner <i>et al</i> , 2006                                                                |
| pDK79              | Expression vector. pACYC ori, pBAD promoter; Kan <sup>R</sup> .                               | Kentner <i>et al</i> , 2006                                                                |
| pDK53              | Tar-CFP expression plasmid; pDK79 derivative.                                                 | Kentner <i>et al</i> , 2006                                                                |
| pDK58              | Tar-YFP expression plasmid; pDK66 derivative.                                                 | Kentner <i>et al</i> , 2006                                                                |
| pDK80              | Tsr-YFP expression plasmid; pDK66 derivative.                                                 | this study                                                                                 |
| pDK198             | Tar-CFP and Tar-YFP expression plasmid; pDK66 derivative.                                     | this study                                                                                 |
| pDK203             | Tar-CFP and Tsr-YFP expression plasmid; pDK66 derivative.                                     | this study                                                                                 |
| pDK158             | YFP-CheA <sup>M981</sup> expression plasmid; pDK4 derivative.                                 | this study                                                                                 |
| pDK173             | CheA <sup>M981</sup> -YFP expression plasmid; pDK66 derivative.                               | this study                                                                                 |
| pDK165             | CFP-CheA <sup>M981</sup> expression plasmid; pDK79 derivative.                                | this study                                                                                 |
| pDK168             | CheA <sup>M981</sup> -CFP expression plasmid; pDK79 derivative.                               | this study                                                                                 |
| pDK36              | YFP-CheA <sup>98-655</sup> expression plasmid; pDK4 derivative.                               | this study                                                                                 |
| pDK57              | CheA <sup>98-655</sup> -YFP expression plasmid; pDK66 derivative.                             | this study                                                                                 |
| pDK38              | CFP-CheA <sup>98-655</sup> expression plasmid; pDK79 derivative.                              | Kentner <i>et al</i> , 2006                                                                |
| pDK52              | CheA <sup>98-655</sup> -CFP expression plasmid; pDK79 derivative.                             | this study                                                                                 |
| pDK12              | YFP-CheW expression plasmid; pDK4 derivative.                                                 | Kentner <i>et al</i> , 2006                                                                |
| pDK54              | CheW-YFP expression plasmid; pDK66 derivative.                                                | this study                                                                                 |
| pDK14              | CFP-CheW expression plasmid; pDK79 derivative.                                                | Kentner <i>et al</i> , 2006                                                                |
| pDK49              | CheW-CFP expression plasmid; pDK79 derivative.                                                | this study                                                                                 |
| pDK20              | YFP-CheR expression plasmid; pDK4 derivative.                                                 | Kentner <i>et al</i> , 2006                                                                |
| pDK19              | CheR-YFP expression plasmid; pDK66 derivative.                                                | this study                                                                                 |
| pDK22              | CFP-CheR expression plasmid; pDK79 derivative.                                                | this study                                                                                 |
| pDK21              | CheR-CFP expression plasmid; pDK79 derivative.                                                | this study                                                                                 |
| pDK116             | YFP-CheR <sup>D154A</sup> expression plasmid; pDK4 derivative.                                | this study                                                                                 |
| pVS19              | YFP-CheY expression plasmid; pTrc99a derivative.                                              | this study                                                                                 |
| pVS18              | CheY-YFP expression plasmid; pTrc99a derivative.                                              | Sourjik and Berg, 2002                                                                     |

|        |                                                                  |                              |
|--------|------------------------------------------------------------------|------------------------------|
| pVS74  | CFP-CheY expression plasmid; pBAD33 derivative.                  | this study                   |
| pVS73  | CheY-CFP expression plasmid; pBAD33 derivative.                  | this study                   |
| pVS63  | YFP-CheZ expression plasmid; pTrc99a derivative.                 | this study                   |
| pVS64  | CheZ-YFP expression plasmid; pTrc99a derivative.                 | Liberman <i>et al</i> , 2004 |
| pVS51  | CFP-CheZ expression plasmid; pBAD33 derivative.                  | this study                   |
| pVS54  | CheZ-CFP expression plasmid; pBAD33 derivative.                  | Sourjik <i>et al</i> , 2002  |
| pVS102 | YFP-CheR expression plasmid; pBAD33 derivative.                  | Kentner <i>et al</i> , 2006  |
| pDK135 | CheB-YFP expression plasmid; pDK79 derivative.                   | this study                   |
| pDK159 | CheB <sup>S164C</sup> -YFP expression plasmid; pDK79 derivative. | this study                   |

<sup>a</sup>pDK expression vectors, and derivatives thereof, used A206K versions of YFP and CFP with abolished weak dimerization (Zacharias *et al*, 2002).

### Supplementary references for Table SI.

- Amann E, Ochs B, Abel KJ (1988) Tightly regulated tac promoter vectors useful for the expression of unfused and fused proteins in *Escherichia coli*. *Gene* **69**: 301-315
- Ames P, Studdert CA, Reiser RH, Parkinson JS (2002) Collaborative signaling by mixed chemoreceptor teams in *Escherichia coli*. *Proc Natl Acad Sci USA* **99**: 7060-7065
- Guzman LM, Belin D, Carson MJ, Beckwith J (1995) Tight regulation, modulation, and high-level expression by vectors containing the arabinose pBAD promoter. *J Bacteriol* **177**: 4121-4130
- Kentner D, Thiem S, Hildenbeutel M, Sourjik V (2006) Determinants of chemoreceptor cluster formation in *Escherichia coli*. *Mol Microbiol* **61**: 407-417
- Liberman L, Berg HC, Sourjik V (2004) Effect of chemoreceptor modification on assembly and activity of the receptor-kinase complex in *Escherichia coli*. *J Bacteriol* **186**: 6643-6646
- Lovdok L, Kollmann M, Sourjik V (2007) Co-expression of signaling proteins improves robustness of the bacterial chemotaxis pathway. *J Biotechnol* **129**: 173-180
- Parkinson JS, Houts SE (1982) Isolation and behavior of *Escherichia coli* deletion mutants lacking chemotaxis functions. *J Bacteriol* **151**: 106-113
- Sourjik V, Berg HC (2000) Localization of components of the chemotaxis machinery of *Escherichia coli* using fluorescent protein fusions. *Mol Microbiol* **37**: 740-751
- Sourjik V, Berg HC (2002) Receptor sensitivity in bacterial chemotaxis. *Proc Natl Acad Sci USA* **99**: 123-127
- Sourjik V, Berg HC (2004) Functional interactions between receptors in bacterial chemotaxis. *Nature* **428**: 437-441
- Vaknin A, Berg HC (2004) Single-cell FRET imaging of phosphatase activity in the *Escherichia coli* chemotaxis system. *Proc Natl Acad Sci USA* **101**: 17072-17077
- Zacharias DA, Violin JD, Newton AC, Tsien RY (2002) Partitioning of lipid-modified monomeric GFPs into membrane microdomains of live cells. *Science* **296**: 913-916

**Table SII FRET mapping of protein interactions by acceptor photobleaching.**

| CFP fusion <sup>a</sup> | YFP fusion <sup>a</sup> | strain                            | strain genotype <sup>b</sup>                | protein-CFP/<br>protein-YFP<br>FRET (%) <sup>c</sup> | protein-CFP/<br>YFP-protein<br>FRET (%) | CFP-protein/<br>protein-YFP<br>FRET (%) | CFP-protein/<br>YFP-protein<br>FRET (%) | Comment                                                                                                                                                                                                                                                                                                   |
|-------------------------|-------------------------|-----------------------------------|---------------------------------------------|------------------------------------------------------|-----------------------------------------|-----------------------------------------|-----------------------------------------|-----------------------------------------------------------------------------------------------------------------------------------------------------------------------------------------------------------------------------------------------------------------------------------------------------------|
| Tar                     | Tar                     | RP437<br>VS116                    | wild type<br><i>flhC</i>                    | 3.0<br>6.6 ± 2.1                                     | N/A                                     | N/A                                     | N/A                                     | Direct interaction.                                                                                                                                                                                                                                                                                       |
| Tar                     | Tsr                     | RP437<br>VS116                    | wild type<br><i>flhC</i>                    | 6<br>15                                              | N/A                                     | N/A                                     | N/A                                     | Direct interaction.                                                                                                                                                                                                                                                                                       |
| Tar                     | CheA <sub>L</sub>       | RP437<br>VS166                    | wild type<br><i>A</i>                       | -<br>-                                               | -<br>-                                  | N/A                                     | N/A                                     | CheA and CheW have previously been shown to bind receptors. The absence of FRET between Tar-CFP and CheA or CheW fusions is probably due to the large distance between the fluorophores. Using a Tar <sup>1-425</sup> -CFP fusion, we detected FRET with CheW-YFP, but not with YFP-CheW or CheA fusions. |
| Tar                     | CheA <sub>S</sub>       | RP437<br>VS166                    | wild type<br><i>A</i>                       | -<br>-                                               | -<br>-                                  | N/A                                     | N/A                                     |                                                                                                                                                                                                                                                                                                           |
| Tar                     | CheW                    | RP437<br>RP1076                   | wild type<br><i>WRBY</i>                    | -<br>-                                               | -<br>-                                  | N/A                                     | N/A                                     |                                                                                                                                                                                                                                                                                                           |
| Tar <sup>1-425</sup>    | CheW                    | RP1041<br>VS116                   | <i>AW tar tap RBYZ flhC</i>                 | 1.4<br>0.8                                           | -<br>-                                  | N/A                                     | N/A                                     |                                                                                                                                                                                                                                                                                                           |
| Tar <sup>1-425</sup>    | CheA <sub>S</sub>       | RP437<br>RP1041                   | wild type<br><i>AW tar tap RBYZ</i>         | -<br>-                                               | -<br>-                                  | N/A                                     | N/A                                     |                                                                                                                                                                                                                                                                                                           |
| Tar                     | CheY                    | RP437<br>VS100                    | wild type<br><i>Y</i>                       | -<br>-                                               | -<br>-                                  | N/A                                     | N/A                                     | No interaction.                                                                                                                                                                                                                                                                                           |
| Tar                     | CheZ                    | RP437<br>VS161                    | wild type<br><i>Z</i>                       | -<br>-                                               | -<br>-                                  | N/A                                     | N/A                                     | No interaction.                                                                                                                                                                                                                                                                                           |
| Tar                     | CheR                    | RP437<br>VS116                    | wild type<br><i>flhC</i>                    | -<br>-                                               | 2.3<br>1.5                              | N/A                                     | N/A                                     | Direct interaction. FRET was only seen with the N-terminal CheR fusion, consistent with its better localization to clusters in fluorescence images.                                                                                                                                                       |
| Tar                     | CheB <sup>S164C</sup>   | VS153<br>DK1<br>VS177             | <i>RBYZ tsr RBYZ tsr tarApp YZ AADP2</i>    | 8.5<br>-<br>1.2 <sup>d</sup>                         | N/A                                     | N/A                                     | N/A                                     | Direct interaction. FRET was also detected with Tar <sup>425-551</sup> /CheB <sup>S164C</sup> , demonstrating that the interaction determined lies in the C-terminal receptor region.                                                                                                                     |
| CheA <sub>L</sub>       | CheA <sub>L</sub>       | RP437<br>VS116                    | wild type<br><i>flhC</i>                    | 2.0<br>1.8                                           | 2.3<br>2.2                              | 1.9<br>1.4                              | 2.1<br>2.3                              | Direct interaction (dimerization).                                                                                                                                                                                                                                                                        |
| CheA <sub>L</sub>       | CheA <sub>S</sub>       | RP437<br>VS116                    | wild type<br><i>flhC</i>                    | 2.2<br>1.8                                           | 2.1<br>2.1                              | 1.7<br>1.8                              | 1.7<br>2.2                              | Direct interaction (dimerization).                                                                                                                                                                                                                                                                        |
| CheA <sub>L</sub>       | CheW                    | RP437<br>VS116                    | wild type<br><i>flhC</i>                    | 4.1<br>5.7                                           | 1.2<br>2.0                              | 3.5<br>4.1                              | 1.2<br>1.6                              | Direct interaction.                                                                                                                                                                                                                                                                                       |
| CheA <sub>L</sub>       | CheY                    | RP437<br>VS116                    | wild type<br><i>flhC</i>                    | 2.0<br>4.6                                           | 1.1<br>3.5                              | 1.2<br>2.4                              | 1.3<br>2.6                              | Direct interaction.                                                                                                                                                                                                                                                                                       |
| CheA <sub>L</sub>       | CheZ                    | RP437<br>VS116                    | wild type<br><i>flhC</i>                    | 2.0<br>2.4                                           | 0.7<br>0.8                              | 3.3<br>2.4                              | 2.1<br>-                                | Direct interaction. In contrast to previous reports, CheZ is observed to bind CheA <sub>L</sub> .                                                                                                                                                                                                         |
| CheA <sub>L</sub>       | CheR                    | RP437<br>VS126<br>VS166<br>UU1250 | wild type<br><i>R A tsr tar tap trg aer</i> | -<br>-<br>-<br>-                                     | -<br>1.0<br>-<br>-                      | -<br>-<br>-<br>-                        | -<br>0.6<br>-<br>-                      | Presumably indirect FRET through binding of CheA and CheR to receptors.                                                                                                                                                                                                                                   |
| CheA <sub>L</sub>       | CheB                    | RP437<br>VS116                    | wild type<br><i>flhC</i>                    | 1.7<br>1.9                                           | N/A                                     | 4.2<br>2.6                              | N/A                                     | Direct interaction.                                                                                                                                                                                                                                                                                       |
| CheA <sub>S</sub>       | CheA <sub>S</sub>       | RP437<br>VS116                    | wild type<br><i>flhC</i>                    | 1.1<br>1.3                                           | 1.2<br>0.9                              | 2.5<br>3.5                              | 2.6<br>2.5                              | Direct interaction (dimerization).                                                                                                                                                                                                                                                                        |
| CheA <sub>S</sub>       | CheW                    | RP437<br>VS116                    | wild type<br><i>flhC</i>                    | 6.3<br>3.9                                           | 2.2<br>0.6                              | 4.2<br>5.0                              | 3.2<br>3.1                              | Direct interaction.                                                                                                                                                                                                                                                                                       |
| CheA <sub>S</sub>       | CheY                    | RP437<br>VS116                    | wild type<br><i>flhC</i>                    | 1.0<br>1.2                                           | 0.9<br>0.6                              | 2.1<br>2.5                              | 2.0<br>3.5                              | Direct interaction.                                                                                                                                                                                                                                                                                       |
| CheA <sub>S</sub>       | CheZ                    | RP437<br>VS116                    | wild type<br><i>flhC</i>                    | 2.1 ± 0.1<br>-                                       | -<br>-                                  | 7.1<br>3.4                              | 4.4<br>2.8                              | Direct interaction.                                                                                                                                                                                                                                                                                       |
| CheA <sub>S</sub>       | CheR                    | RP437<br>VS126<br>VS166           | wild type<br><i>R A</i>                     | -<br>-<br>-                                          | 1 ± 0.3<br>1.2 ± 0.1<br>-               | -<br>-<br>-                             | -<br>-<br>-                             | See CheA <sub>L</sub> /CheR.                                                                                                                                                                                                                                                                              |

|                   |      |                                            |                                                              |                             |                         |                               |                       |                                                                                                                                                                                                                                                                                                                                                               |
|-------------------|------|--------------------------------------------|--------------------------------------------------------------|-----------------------------|-------------------------|-------------------------------|-----------------------|---------------------------------------------------------------------------------------------------------------------------------------------------------------------------------------------------------------------------------------------------------------------------------------------------------------------------------------------------------------|
|                   |      | UU1250                                     | <i>tsr tar tap trg aer</i>                                   | -                           | -                       | -                             | -                     |                                                                                                                                                                                                                                                                                                                                                               |
| CheA <sub>S</sub> | CheB | VS153                                      | <i>RBYZ tsr</i>                                              |                             | N/A                     | 3.9                           | N/A                   | Direct interaction. FRET was also detected for CheA <sup>98-257</sup> /CheB <sup>1-134</sup> , consistent with an association of the CheA response regulator binding domain with the N-terminal CheB domain.                                                                                                                                                  |
| CheW              | CheW | RP437<br>RBB1041<br>VS116                  | wild type<br><i>AW tar tap RBYZ flhC</i>                     | 4.5<br>2.1<br>-             | 2.3<br>1.5<br>-         | 3.2<br>2.4<br>-               | 2.7<br>1.3<br>-       | Indirect FRET through binding of CheW to receptor and possibly CheA oligomers.                                                                                                                                                                                                                                                                                |
| CheW              | CheY | RP437<br>RP1076<br>RBB1041<br>VS177        | wild type<br><i>W tar tap RBY AW tar tap RBYZ YZ cheAΔP2</i> | 1.2<br>1.5<br>-<br>-        | -<br>-<br>-<br>-        | 2.8<br>4.1<br>-<br>-          | -<br>-<br>-<br>-      | Presumably indirect FRET through binding of CheW and CheY to CheA.                                                                                                                                                                                                                                                                                            |
| CheW              | CheZ | RP437<br>VS161                             | wild type<br><i>Z</i>                                        | -<br>-                      | -<br>-                  | -<br>-                        | -<br>-                | No interaction.                                                                                                                                                                                                                                                                                                                                               |
| CheW              | CheR | RP437<br>VS126                             | wild type<br><i>R</i>                                        | -<br>-                      | -<br>-                  | -<br>-                        | -<br>-                | No interaction.                                                                                                                                                                                                                                                                                                                                               |
| CheW              | CheB | RP437<br>RP1076<br>RBB1041                 | wild type<br><i>W tar tap RBY AW tar tap RBYZ</i>            | 2.0<br>3.0<br>-             | N/A                     | 1.7<br>2.5 ± 0.8<br>-         | N/A                   | Presumably indirect FRET through binding of CheW and CheB to CheA.                                                                                                                                                                                                                                                                                            |
| CheY              | CheY | RP437<br>VS100<br>RP1076<br>VS167<br>VS116 | wild type<br><i>Y W tar tap RBY tap RBYZ A flhC</i>          | 0.7<br>+/-<br>+/-<br>-<br>- | -<br>+/-<br>-<br>-<br>- | -<br>1.3 ± 0.6<br>-<br>-<br>- | -<br>-<br>-<br>-<br>- | Two CheY fusions probably come into proximity when CheY interacts with CheA, CheZ and/or FlhM. Our measurements of FRET responses to chemotactic stimulation showed that these interactions are phosphorylation-dependent, and we assume that variations in CheY phosphorylation account for variations in acceptor bleaching measurements of CheY/CheY FRET. |
| CheZ              | CheY | RP437<br>RP1076<br>VS166                   | wild type<br><i>W tar tap RBY A</i>                          | 3.0<br>2.8<br>-             | 2.0<br>2.7<br>-         | 1.9<br>1.5<br>-               | 2.2<br>1.5<br>-       | Direct interaction between CheZ and phospho-CheY. FRET in RP1076, where CheA should be largely inactive by lack of CheW and CheY should therefore be non-phosphorylated, is probably due to binding of CheZ and dephosphorylated CheY to CheA. Stimulation-dependent FRET between CheY and CheZ was only observed for the C-terminal CheZ fusions.            |
| CheY              | CheR | RP437<br>VS100<br>VS126                    | wild type<br><i>Y R</i>                                      | -<br>-<br>-                 | -<br>-<br>-             | -<br>-<br>-                   | -<br>-<br>-           | No interaction.                                                                                                                                                                                                                                                                                                                                               |
| CheY              | CheB | RP437<br>RP1076<br>RBB1041                 | wild type<br><i>W tar tap RBY AW tar tap RBYZ</i>            | -<br>+/-<br>-               | N/A                     | -<br>-<br>-                   | N/A                   | FRET was only detected in some experiments in strain RP1076, probably as a result of CheY and CheB both binding to CheA. Competition of                                                                                                                                                                                                                       |

|      |      |                                    |                                                                |                      |                      |                      |                              |                                                                                                                                                                                                                                                  |
|------|------|------------------------------------|----------------------------------------------------------------|----------------------|----------------------|----------------------|------------------------------|--------------------------------------------------------------------------------------------------------------------------------------------------------------------------------------------------------------------------------------------------|
|      |      |                                    |                                                                |                      |                      |                      |                              | the two fusions and, in wild type cells, of native CheY/CheB for CheA could explain poor FRET signals. As for CheY/CheY FRET, variations between experiments can be explained by variations in the response regulator phosphorylation level.     |
| CheZ | CheZ | RP437<br>VS116                     | wild type<br><i>flhC</i>                                       | 3.4<br>3.5           | 1.9<br>2.2           | 3.2<br>4.2           | 3.1<br>3.8                   | Direct interaction (dimerization).                                                                                                                                                                                                               |
| CheZ | CheR | RP437<br>VS161<br>VS126            | wild type<br><i>Z</i><br><i>R</i>                              | -<br>-<br>-          | -<br>-<br>-          | -<br>-<br>-          | -<br>-<br>-                  | No interaction.                                                                                                                                                                                                                                  |
| CheZ | CheB | RP437<br>VS124<br>VS149<br>VS167   | wild type<br><i>BYZ</i><br><i>RBYZ</i><br><i>tap RBYZ A</i>    | -<br>3.2<br>0.8<br>- | -<br>N/A             | -<br>3.8<br>1.3<br>- | -<br>N/A                     | Interaction presumably results from CheZ and CheB both binding to CheA. The absence of FRET in wild type cells could be due to competitive binding of native proteins.                                                                           |
| CheR | CheR | RP437<br>VS126<br>RBB1041<br>VS116 | wild type<br><i>R</i><br><i>AW tar tap RBYZ</i><br><i>flhC</i> | -<br>-<br>-<br>-     | -<br>0.9<br>1.2<br>- | -<br>-<br>-<br>-     | 1.6<br>2.1 ± 0.4<br>2.4<br>- | CheR proteins probably meet when binding to receptors. FRET is more efficient for N-terminal CheR fusions, which localize better to clusters.                                                                                                    |
| CheR | CheB | RP437<br>VS149                     | wild type<br><i>RBYZ</i>                                       | -<br>-               | -<br>N/A             | -<br>-               | -<br>N/A                     | Although CheR and CheB both bind to receptors, no FRET was detected, probably due to mutual displacement from their overlapping binding sites and the distance between fluorescent protein fusions bound to different receptors being too large. |
| CheB | CheB | RP437<br>RP4972                    | wild type<br><i>B</i>                                          | -<br>-               | -<br>N/A             | -<br>-               | -<br>N/A                     | No interaction.                                                                                                                                                                                                                                  |

<sup>a</sup>Expression of CFP and YFP fusions was induced with 0.01% arabinose and 50  $\mu$ M IPTG, respectively, except for pDK58, pDK138, pDK159, pDK203 (20  $\mu$ M IPTG) and pDK198 (100  $\mu$ M IPTG).

<sup>b</sup>Deletions of chemotaxis genes are abbreviated by single letters, i.e. *Y* for *cheY*.

<sup>c</sup>FRET efficiency was defined as a percentage change in CFP fluorescence upon bleaching (see Figure 2),  $(C_{\text{post}} - C_{\text{pre}})/C_{\text{post}} \times 100\%$ , where  $C_{\text{pre}}$  is CFP fluorescence before YFP bleaching, and  $C_{\text{post}}$  is CFP fluorescence after YFP bleaching.

<sup>d</sup>Measured as a percentage change in CFP fluorescence upon saturating attractant stimulation in the flow cell.



**Table SIII Total and stimulation-dependent FRET values**

| Fusion pair <sup>a</sup>                          | Total FRET (%) <sup>b</sup> | Stimulus-dependent | Stimulus-dependent FRET/ |
|---------------------------------------------------|-----------------------------|--------------------|--------------------------|
|                                                   |                             | FRET (%)           | Total FRET (%)           |
| Tar-CFP/Tar-YFP                                   | 13.6 ±1.0                   | 2.1 ±0.1           | 15.5 ±1.5                |
| Tar-CFP/Tsr-YFP                                   | 20.8 ±0.9                   | 2.8 ± 0.4          | 13.2 ±1.4                |
| Tar-CFP/CheB <sup>S164C</sup> -YFP                | 8.9 ±1.1                    | 4.2 ±0.4           | 47.8 ± 4.3               |
| CFP-CheA <sub>S</sub> /CheY-YFP                   | 5.5 ±0.8                    | 2.7 ±0.4           | 48.5 ±0.5                |
| CFP-CheA <sub>S</sub> /CheB <sup>S164C</sup> -YFP | 3.6 ±0.3                    | 1.1 ±0.1           | 32.3 ±1.0                |
| CheZ-CFP/CheY-YFP                                 | 8.6 ±0.3                    | 6.5 ±0.4           | 76 ±2.0                  |
| FliM-CFP/CheY-YFP                                 | 2.2 ±0.1                    | 1.9 ±0.1           | 85 ±6                    |

<sup>a</sup>FRET amplitude was determined in the same strains that have been used in Figures 3 and 4: Tar/Tar and Tar/Tsr pairs were measured in strain VS116 (*flhC*) and all other FRET pairs in strain VS153 (*tsr cheR cheB cheY cheZ*).

<sup>b</sup>FRET efficiency was determined as in Table SII.

**Table SIV Expression levels of FRET pairs used for attractant stimulation experiments**

| Fusion pair                                       | CFP <sup>a</sup> (×10 <sup>3</sup> ) | YFP (×10 <sup>3</sup> ) | CFP (μM)   | YFP (μM)   |
|---------------------------------------------------|--------------------------------------|-------------------------|------------|------------|
|                                                   | molecules/cell)                      | molecules/cell)         |            |            |
| Tar-CFP/Tar-YFP                                   | 10.1 ±1.3                            | 18.7 ±1.8               | 9.3 ± 1.2  | 17.3 ± 1.7 |
| Tar-CFP/Tsr-YFP                                   | 9.7 ±1.8                             | 58.5 ±4.6               | 9.0 ± 1.7  | 54.0 ± 4.3 |
| Tar-CFP/CheB <sup>S164C</sup> -YFP                | 2.4 ±0.2                             | 46.1 ±5.5               | 2.3 ± 0.2  | 42.5 ± 5.1 |
| CFP-CheA <sub>S</sub> /CheY-YFP                   | 18.7 ±2.2                            | 37.9 ±3.0               | 17.2 ± 2.0 | 34.9 ± 2.8 |
| CFP-CheA <sub>S</sub> /CheB <sup>S164C</sup> -YFP | 14.9 ±1.3                            | 45.3 ±7.2               | 13.8 ± 1.2 | 41.8 ± 6.1 |
| CheZ-CFP/CheY-YFP                                 | 12.7 ±0.5                            | 24.0 ±3.0               | 11.7 ± 0.5 | 22.1 ± 3.0 |
| FliM-CFP/CheY-YFP                                 | 32.5 ±1.6                            | 36.3 ±6.1               | 30.0 ± 1.5 | 33.4 ± 5.6 |

<sup>a</sup>Expression levels were quantified as described in Materials and methods.
